# Supplementary material
Source: HighWire-hosted journal article supplement (https://www.bmj.com/content/suppl/2006/11/09/333.7576.1023)
Supplement: DDuck.pdf [file DDuck.pdf]

## Donald Duck

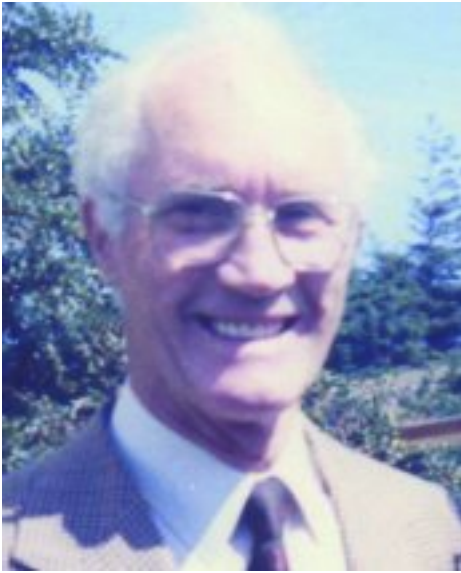

Former medical missionary and general practitioner Mallaig (b 1924; q Edinburgh 1950), died from complications of Parkinson's disease on 8 June 2006.

After a brief foray into civil engineering, Donald Duck trained in medicine at the college in Edinburgh. He spent a year as general practice trainee in Skye before moving abroad with his new wife, Jean (also a doctor), to the Medical Missionary College at Ludhiana. There he learned Urdu and Hindi. He and his family then moved to hospitals in Quetta and later Kashmir, where he worked in a wide range of specialties, including eye surgery, until his return back to Britain in 1968. From 1968 till his retiral in 1993 Donald was the single handed general practitioner in Mallaig.

Though originally from London, he relished the highlands of Scotland. He was a keen fisherman and stalker. He was an elder and stalwart supporter of the kirk in Mallaig, and a gifted lay preacher. He had a keen sense of humour and enjoyed many situations where his name led to confusion—for example, when signing cheques or prescriptions (he preceded the eponymous cartoon character by 10 years).

His wife predeceased him in 1997, and he is survived by his four children (one a doctor) and seven grandchildren. [**J Duck, A K Henderson**]
